# Supplementary material for: Natural Variation in Elicitation of Defense-Signaling Associates to Field Resistance Against the Spot Blotch Disease in Bread Wheat (Triticum aestivum L.)
Source: Front Plant Sci. 2018 May 16;9:636. doi: 10.3389/fpls.2018.00636 (PMC5964214; doi:10.3389/fpls.2018.00636)
Supplement: Supplementary file 7 [file Table_7.XLSX]

## Sheet: Total free phenolics
Supplementary Table 7. Total free phenolic acid levels (µg g-1 FW; A), free individual phenolic acids (µg g-1 FW; B), total bound phenolic content (µg g-1 FW; C), and bound individual phenolic acids distribution (µg g-1 FW; D) in 55 genotypes during spot blotch infection. Values are expressed as mean ± SD. ANOVA is used to determine significant differences (P≤0.05) across the time points within a…
A. Total free phenolic acid levels (µg g-1 FW) in CRP genotypes during spot blotch infection. Red colors belong to susceptible genotypes
Genotype	0 hpi	12 hpi	24 hpi	P-value
Sonalika	2.14 ± 0.34	2.49 ± 0.02	2.49 ± 0.24	0.204089
CRP2	1.40 ± 0.09	4.01 ± 0.08	2.00 ± 0.17	5.24047e-06
CRP3	1.31 ± 0.18	2.48 ± 0.67	2.88 ± 0.07	0.00454235
Chirya.3	1.37 ± 0.82	3.00 ± 0.16	2.20 ± 0.11	0.0229509
CRP5	1.68 ± 0.75	1.82 ± 0.23	1.62 ± 0.33	0.0581808
CRP6	1.97 ± 0.51	3.29 ± 0.18	2.90 ± 0.34	0.0294691
CRP7	1.06 ± 0.46	3.13 ± 0.26	2.79 ± 0.94	0.000355289
CRP8	0.96 ± 0.77	3.71 ± 0.09	2.16 ± 0.70	0.000930301
CRP9	1.41 ± 0.15	2.86 ± 0.17	2.48 ± 0.35	0.000879376
CRP10	1.22 ± 0.31	3.24 ± 0.44	2.13 ± 0.77	0.0110534
CRP11	1.50 ± 0.26	3.52 ± 0.22	3.18 ± 0.34	0.000243612
CRP12	1.08 ± 0.40	2.47 ± 0.34	2.57 ± 0.46	0.00703531
CRP13	1.19 ± 0.11	1.42 ± 0.34	1.53 ± 0.12	4.5225e-05
CRP14	1.53 ± 0.26	3.37 ± 0.24	2.56 ± 0.16	0.000167641
CRP15	1.58 ± 0.14	2.78 ± 0.14	2.93 ± 0.24	0.000163737
CRP16	1.32 ± 0.29	3.69 ± 0.39	2.67 ± 0.19	0.000230143
CRP17	1.17 ± 0.33	3.15 ± 0.13	2.27 ± 0.13	9.51845e-05
CRP18	1.58 ± 0.30	3.79 ± 0.25	2.83 ± 0.11	7.48052e-05
CRP19	1.65 ± 0.89	3.41 ± 0.67	2.24 ± 0.14	0.0402866
CRP20	1.11 ± 0.25	4.29 ± 0.54	1.81 ± 0.55	0.00753486
CRP21	1.24 ± 0.13	3.07 ± 0.10	2.41 ± 1.07	0.0310187
CRP22	1.18 ± 0.22	2.55 ± 0.18	2.92 ± 1.04	0.0322873
CRP23	1.30 ± 0.82	3.33 ± 0.26	2.99 ± 0.10	0.0053257
CIANO T79	1.48 ± 0.23	1.77 ± 0.03	1.65 ± 0.08	0.116982
CRP25	1.51 ± 0.31	2.78 ± 0.35	2.45 ± 0.11	0.00339688
CRP26	0.95 ± 0.21	3.70 ± 0.43	2.41 ± 0.12	7.14046e-05
CRP27	1.81 ± 0.55	2.88 ± 1.25	2.73 ± 0.11	0.277834
CRP28	1.78 ± 0.45	3.47 ± 0.19	3.24 ± 0.09	0.000699626
CRP29	1.67 ± 1.00	3.24 ± 0.13	1.95 ± 0.21	0.0364226
CRP30	1.55 ± 0.12	2.99 ± 0.16	3.18 ± 0.22	1.1451e-05
CRP31	2.40 ± 0.80	3.92 ± 0.33	2.38 ± 0.30	0.0181849
CRP32	1.83 ± 0.18	3.87 ± 0.10	2.97 ± 0.18	1.45655e-05
CRP33	1.13 ± 0.14	3.50 ± 0.56	2.24 ± 0.51	0.00186215
CRP34	1.53 ± 0.44	2.50 ± 0.13	2.21 ± 0.05	0.0111563
CRP35	1.92 ± 0.80	1.61 ± 0.32	2.84 ± 0.07	0.0547736
CRP36	2.00 ± 0.09	2.43 ± 0.42	2.65 ± 0.24	0.0751981
Yangmai #6	1.24 ± 0.01	2.67 ± 0.07	2.27 ± 0.84	0.0287898
CRP38	1.13 ± 0.15	2.60 ± 0.16	2.56 ± 0.36	0.000450103
CRP39	1.54 ± 0.40	1.78 ± 0.26	2.33 ± 0.31	0.000464037
CRP40	1.54 ± 0.35	2.18 ± 0.12	2.26 ± 0.30	0.0179595
CRP41	1.18 ± 0.18	2.33 ± 0.20	2.70 ± 0.11	0.000425204
CRP42	1.68 ± 0.71	3.24 ± 0.16	2.53 ± 1.04	0.0327136
CRP43	1.58 ± 0.25	2.14 ± 0.04	2.03 ± 0.44	0.055927
CRP44	1.23 ± 1.37	4.17 ± 0.04	2.62 ± 0.08	0.0113846
CRP45	0.95 ± 0.19	3.00 ± 0.03	2.47 ± 0.28	2.75228e-05
CRP46	1.75 ± 0.88	1.87 ± 0.12	1.99 ± 0.07	0.742074
CRP47	1.92 ± 0.49	3.95 ± 0.24	1.93 ± 0.69	0.00034603
CRP48	1.53 ± 0.35	1.96 ± 1.47	2.08 ± 0.32	0.296079
CRP49	1.13 ± 0.17	3.18 ± 0.15	2.18 ± 0.63	7.16297e-05
CRP50	1.93 ± 0.98	2.24 ± 0.25	2.78 ± 0.24	0.237407
CRP51	1.93 ± 0.91	3.89 ± 0.22	2.14 ± 0.45	0.00619621
CRP52	1.37 ± 0.32	3.46 ± 0.18	2.44 ± 0.08	9.17469e-05
CRP53	0.95 ± 0.34	2.30 ± 0.27	2.38 ± 0.07	0.000730224
CRP54	1.34 ± 1.01	1.91 ± 0.28	2.33 ± 0.33	0.158044
CRP55	1.11 ± 0.22	1.28 ± 0.20	1.31 ± 0.13	0.0021985

## Sheet: Free individual phenolics
B. Levels of free individual phenolic acids (µg g-1 FW) in 55 CRP genotypes upon spot blotch infection. Values are expressed as mean ± SD; ANOVA was done to calculate the differences in the genotypes across the time points; significant difference at P≤0.05. Red colors belong to susceptible genotypes
4-Hydroxybenzoic acid						Syringic acid						Vanillic acid
Genotype	0 hpi	12 hpi	24 hpi	P-value		Genotype	0 hpi	12 hpi	24 hpi	P-value		Genotype	0 hpi	12 hpi	24 hpi	P-value
Sonalika	8.34 ± 5.02	7.77 ± 0.35	11.09 ± 0.70	0.391764		Sonalika	27.15 ± 8.13	28.04 ± 2.31	29.71 ± 5.51	0.837369		Sonalika	18.83 ± 2.59	21.91 ± 2.77	23.41 ± 3.88	0.266617
CRP2	8.57 ± 4.74	19.10 ± 1.35	29.68 ± 6.01	0.00358242		CRP2	22.38 ± 2.46	35.87 ± 0.25	51.19 ± 16.68	0.0306835		CRP2	23.59 ± 9.55	34.63 ± 0.54	33.31 ± 0.54	0.0951536
CRP3	10.47 ± 1.44	16.33 ± 1.97	21.17 ± 2.54	0.00198693		CRP3	26.41 ± 7.92	39.25 ± 4.82	48.33 ± 0.03	0.00535447		CRP3	15.72 ± 12.99	31.90 ± 0.41	30.59 ± 0.41	0.0694665
Chirya.3	12.88 ± 9.19	16.60 ± 1.73	20.96 ± 0.78	0.265072		Chirya.3	24.18 ± 2.88	45.34 ± 2.93	54.20 ± 6.67	0.00049522		Chirya.3	20.40 ± 10.41	28.98 ± 2.80	31.72 ± 0.37	0.0605276
CRP5	8.21 ± 4.87	11.46 ± 3.31	12.90 ± 1.24	0.00765705		CRP5	24.58 ± 9.92	25.64 ± 1.20	26.91 ± 4.26	0.902259		CRP5	21.16 ± 14.81	29.71 ± 0.28	31.02 ± 0.28	0.370647
CRP6	7.85 ± 3.88	19.75 ± 1.35	20.90 ± 10.76	0.611346		CRP6	26.17 ± 2.79	45.12 ± 17.86	56.75 ± 7.19	0.138473		CRP6	15.75 ± 2.78	30.10 ± 0.29	28.79 ± 0.29	0.421656
CRP7	11.96 ± 7.05	17.80 ± 4.75	20.79 ± 1.25	0.0377464		CRP7	21.31 ± 3.89	43.87 ± 0.22	50.72 ± 0.17	0.257536		CRP7	24.85 ± 9.19	39.45 ± 0.26	46.02 ± 0.26	0.0652573
CRP8	8.23 ± 4.70	16.65 ± 0.74	17.75 ± 2.20	0.716416		CRP8	20.21 ± 3.07	42.65 ± 7.79	53.44 ± 2.52	0.0598313		CRP8	20.18 ± 9.69	30.44 ± 0.24	22.88 ± 1.23	0.183717
CRP9	10.94 ± 2.84	17.83 ± 2.60	21.16 ± 2.67	0.177559		CRP9	28.10 ± 12.37	41.42 ± 5.23	56.51 ± 6.14	0.257227		CRP9	23.64 ± 11.29	27.19 ± 3.20	27.67 ± 2.91	1.0512e-05
CRP10	10.26 ± 1.91	15.31 ± 1.73	26.00 ± 0.76	4.63275e-05		CRP10	26.01 ± 4.38	37.86 ± 4.01	40.86 ± 3.59	0.00882049		CRP10	19.26 ± 3.37	41.27 ± 11.32	43.24 ± 11.32	0.037613
CRP11	8.86 ± 5.84	13.48 ± 5.56	20.20 ± 2.45	0.628957		CRP11	25.05 ± 2.61	39.74 ± 4.17	41.47 ± 7.85	0.328358		CRP11	18.69 ± 3.68	32.62 ± 3.29	37.44 ± 3.27	0.93501
CRP12	12.55 ± 5.33	18.58 ± 1.76	20.50 ± 0.15	0.778835		CRP12	26.91 ± 3.68	40.88 ± 7.94	43.51 ± 2.36	0.85497		CRP12	19.92 ± 6.82	36.48 ± 4.13	29.91 ± 4.13	0.744704
CRP13	9.81 ± 1.89	11.05 ± 0.06	12.89 ± 1.44	0.303517		CRP13	29.79 ± 4.22	30.64 ± 2.43	32.87 ± 1.87	0.920077		CRP13	17.95 ± 8.45	18.89 ± 0.16	21.08 ± 4.00	0.937263
CRP14	7.65 ± 1.78	17.49 ± 0.91	17.92 ± 3.29	0.0816719		CRP14	26.98 ± 5.50	40.22 ± 9.36	45.92 ± 0.71	0.108908		CRP14	16.10 ± 6.74	35.67 ± 3.86	34.36 ± 3.86	0.000950767
CRP15	10.30 ± 0.72	13.01 ± 1.27	17.87 ± 2.33	0.0234582		CRP15	24.04 ± 6.18	34.86 ± 0.33	46.15 ± 1.69	0.528909		CRP15	21.87 ± 7.26	34.62 ± 0.88	33.30 ± 0.88	0.114662
CRP16	8.88 ± 7.56	15.15 ± 1.90	27.67 ± 13.83	0.102469		CRP16	26.85 ± 9.24	37.16 ± 1.90	45.91 ± 0.33	0.136887		CRP16	17.44 ± 12.90	41.67 ± 5.04	48.84 ± 1.96	0.00116977
CRP17	9.54 ± 5.66	16.58 ± 2.02	18.85 ± 21.24	0.0020688		CRP17	21.49 ± 2.42	41.49 ± 1.12	52.28 ± 9.64	0.0765473		CRP17	20.15 ± 10.65	47.65 ± 2.54	46.34 ± 2.54	0.00570186
CRP18	7.15 ± 3.39	17.27 ± 1.16	25.59 ± 2.78	0.320637		CRP18	23.81 ± 11.75	37.87 ± 4.82	50.15 ± 0.33	0.95219		CRP18	21.31 ± 6.48	35.42 ± 0.65	34.10 ± 0.65	0.000500837
CRP19	13.37 ± 4.12	14.42 ± 0.64	19.39 ± 7.21	0.788627		CRP19	22.12 ± 2.91	35.91 ± 1.04	63.05 ± 0.68	0.0614139		CRP19	18.96 ± 5.84	43.39 ± 2.60	42.07 ± 2.60	0.00116977
CRP20	9.01 ± 0.84	17.56 ± 0.99	21.21 ± 1.11	1.41888e-05		CRP20	21.10 ± 2.64	37.19 ± 2.76	45.13 ± 0.56	3.29695e-05		CRP20	18.33 ± 5.05	30.22 ± 1.71	34.63 ± 3.46	0.0040599
CRP21	8.15 ± 5.01	17.58 ± 4.54	21.58 ± 22.53	0.278803		CRP21	19.51 ± 0.65	48.53 ± 1.36	44.65 ± 0.35	0.12354		CRP21	20.32 ± 11.68	38.18 ± 6.81	36.87 ± 6.81	0.894693
CRP22	8.78 ± 1.77	19.74 ± 0.02	23.71 ± 3.15	0.756485		CRP22	19.16 ± 2.63	43.54 ± 1.98	52.11 ± 8.05	0.989659		CRP22	17.69 ± 9.22	32.27 ± 7.43	30.96 ± 7.43	0.574996
CRP23	12.87 ± 2.98	20.08 ± 0.07	24.35 ± 5.77	0.155061		CRP23	23.50 ± 3.16	41.97 ± 1.08	45.44 ± 0.39	0.981413		CRP23	21.05 ± 5.21	37.74 ± 15.37	36.43 ± 15.37	0.894208
CIANO T79	8.00 ± 1.01	8.16 ± 1.66	11.11 ± 1.35	0.492649		CIANO T79	20.55 ± 11.37	22.49 ± 0.12	24.90 ± 4.60	0.00448602		CIANO T79	24.95 ± 3.79	27.74 ± 1.09	22.00 ± 2.02	0.759089
CRP25	7.86 ± 3.77	13.76 ± 0.31	27.93 ± 6.62	0.0152207		CRP25	21.01 ± 8.92	42.72 ± 2.60	57.75 ± 1.05	0.000234384		CRP25	21.25 ± 4.18	30.30 ± 1.38	28.99 ± 1.38	0.121242
CRP26	6.57 ± 1.95	18.67 ± 4.95	19.13 ± 2.96	0.121896		CRP26	21.68 ± 8.32	39.10 ± 4.02	47.60 ± 11.94	0.2148		CRP26	20.89 ± 6.56	35.88 ± 6.91	26.65 ± 6.55	0.101761
CRP27	5.49 ± 0.41	16.35 ± 5.80	18.63 ± 3.64	0.966467		CRP27	25.61 ± 9.52	40.42 ± 6.07	60.42 ± 2.30	0.262498		CRP27	21.80 ± 12.69	40.13 ± 8.67	36.79 ± 7.42	0.759089
CRP28	8.73 ± 1.69	22.22 ± 0.52	20.85 ± 3.64	0.00849543		CRP28	24.11 ± 9.67	39.82 ± 1.59	59.57 ± 4.98	0.00429417		CRP28	22.22 ± 8.64	40.62 ± 1.82	39.30 ± 1.82	0.178417
CRP29	7.12 ± 2.48	22.24 ± 0.16	21.30 ± 5.01	0.714984		CRP29	24.88 ± 9.27	45.24 ± 0.51	58.97 ± 1.63	0.8678		CRP29	18.18 ± 12.39	49.89 ± 1.00	48.57 ± 1.00	0.0389695
CRP30	7.95 ± 2.31	17.18 ± 0.38	18.58 ± 6.79	0.0392957		CRP30	23.15 ± 3.51	41.10 ± 3.71	56.31 ± 7.56	0.000118922		CRP30	24.51 ± 4.51	34.01 ± 1.97	37.70 ± 1.97	0.0178063
CRP31	8.09 ± 2.59	11.82 ± 0.80	12.45 ± 3.90	0.548767		CRP31	24.38 ± 6.81	29.21 ± 1.68	29.58 ± 2.07	0.701077		CRP31	23.05 ± 6.44	30.13 ± 12.34	32.81 ± 12.34	0.739816
CRP32	7.99 ± 0.39	21.93 ± 1.02	19.02 ± 1.50	0.638577		CRP32	25.57 ± 5.24	42.59 ± 6.18	59.37 ± 4.15	0.54176		CRP32	23.43 ± 12.05	40.78 ± 3.27	43.82 ± 2.24	0.330344
CRP33	9.60 ± 2.02	27.86 ± 1.39	20.57 ± 5.22	0.740951		CRP33	21.90 ± 3.18	58.10 ± 9.79	56.95 ± 4.60	0.437506		CRP33	18.47 ± 5.48	49.07 ± 2.79	34.90 ± 1.89	0.956586
CRP34	9.33 ± 2.67	15.68 ± 1.79	17.80 ± 0.05	5.69732e-06		CRP34	19.66 ± 9.03	44.19 ± 1.83	55.15 ± 0.87	0.00574758		CRP34	18.92 ± 1.32	41.14 ± 8.02	39.82 ± 8.02	0.0579125
CRP35	9.39 ± 5.48	18.20 ± 1.90	19.59 ± 1.20	0.180716		CRP35	25.55 ± 5.52	44.98 ± 2.21	55.38 ± 8.67	0.269413		CRP35	24.51 ± 6.19	30.40 ± 0.35	29.08 ± 0.35	0.0958455
CRP36	12.44 ± 4.68	15.59 ± 1.32	18.27 ± 4.50	7.78075e-11		CRP36	21.23 ± 3.34	47.03 ± 1.89	58.43 ± 11.15	0.00296953		CRP36	18.63 ± 5.79	35.56 ± 2.93	34.25 ± 2.93	0.00694241
Yangmai #6	11.43 ± 2.08	21.71 ± 0.13	20.55 ± 1.00	0.0885574		Yangmai #6	20.37 ± 6.51	47.22 ± 2.93	53.68 ± 2.82	0.000120573		Yangmai #6	19.39 ± 2.96	35.55 ± 5.48	34.24 ± 5.48	0.11404
CRP38	10.56 ± 4.07	20.27 ± 0.04	17.80 ± 0.70	0.713633		CRP38	25.87 ± 2.42	55.04 ± 9.45	49.52 ± 1.35	0.863034		CRP38	20.56 ± 4.58	31.88 ± 0.54	30.56 ± 0.54	0.0958455
CRP39	9.61 ± 1.72	11.92 ± 0.13	12.82 ± 2.38	0.00244695		CRP39	23.74 ± 4.94	27.89 ± 0.61	29.56 ± 0.55	7.79119e-06		CRP39	20.64 ± 8.32	24.75 ± 0.85	26.43 ± 0.85	0.00694241
CRP40	11.65 ± 0.16	15.37 ± 4.29	22.04 ± 14.24	0.384051		CRP40	22.23 ± 5.44	43.77 ± 4.98	51.10 ± 0.09	0.000412085		CRP40	17.57 ± 1.69	31.17 ± 3.60	36.76 ± 3.69	0.000442756
CRP41	12.27 ± 3.79	18.23 ± 1.65	20.56 ± 4.21	0.301607		CRP41	25.76 ± 7.57	46.76 ± 1.26	58.14 ± 1.67	0.199752		CRP41	23.67 ± 4.24	34.35 ± 4.24	33.03 ± 4.24	0.279454
CRP42	10.67 ± 4.99	22.28 ± 0.13	17.01 ± 0.45	0.930339		CRP42	29.13 ± 2.02	52.62 ± 0.73	61.78 ± 3.20	0.651683		CRP42	15.13 ± 7.07	35.67 ± 0.40	34.35 ± 0.40	0.683043
CRP43	6.68 ± 3.37	14.81 ± 4.13	17.48 ± 0.34	0.736278		CRP43	21.22 ± 2.28	47.06 ± 1.34	48.85 ± 2.97	0.455221		CRP43	17.64 ± 6.42	42.21 ± 0.78	32.88 ± 1.07	0.467504
CRP44	10.19 ± 2.23	18.10 ± 1.39	21.92 ± 1.70	0.0331103		CRP44	22.74 ± 3.32	53.40 ± 5.80	55.11 ± 7.52	0.00120286		CRP44	19.01 ± 3.17	35.23 ± 9.54	33.92 ± 9.54	0.0178019
CRP45	9.84 ± 6.38	15.07 ± 1.12	19.00 ± 0.04	0.0822635		CRP45	20.65 ± 3.63	59.13 ± 4.51	58.80 ± 0.26	0.0565945		CRP45	19.03 ± 3.91	37.40 ± 3.04	38.98 ± 1.36	0.968328
CRP46	8.82 ± 4.06	16.86 ± 1.47	18.01 ± 0.84	0.00153895		CRP46	20.73 ± 1.82	43.36 ± 8.07	56.28 ± 6.70	0.000166885		CRP46	15.42 ± 8.38	36.16 ± 15.11	38.65 ± 15.11	0.839316
CRP47	10.98 ± 3.29	19.75 ± 1.35	22.43 ± 1.31	0.235478		CRP47	26.36 ± 7.79	54.98 ± 1.91	54.11 ± 5.10	0.00279101		CRP47	19.54 ± 7.03	33.71 ± 9.83	34.77 ± 8.03	0.747154
CRP48	9.38 ± 5.11	14.03 ± 2.05	14.56 ± 1.25	0.0114327		CRP48	24.43 ± 4.36	25.08 ± 1.74	27.94 ± 0.47	0.741151		CRP48	25.42 ± 6.63	27.30 ± 2.30	28.36 ± 0.36	0.804889
CRP49	11.75 ± 1.99	22.01 ± 0.78	21.98 ± 0.63	0.000206724		CRP49	20.62 ± 2.36	53.18 ± 6.52	48.81 ± 0.06	8.3099e-05		CRP49	25.16 ± 4.63	32.30 ± 3.23	30.98 ± 3.23	0.14713
CRP50	12.63 ± 4.93	18.29 ± 1.59	24.07 ± 4.13	0.111939		CRP50	29.62 ± 4.24	43.32 ± 3.03	63.11 ± 0.73	3.125e-05		CRP50	21.03 ± 3.35	33.44 ± 1.39	32.12 ± 1.39	0.000929049
CRP51	8.60 ± 8.15	18.00 ± 1.55	22.24 ± 1.43	0.114519		CRP51	26.27 ± 1.96	47.66 ± 1.51	53.97 ± 3.00	0.345268		CRP51	15.98 ± 12.03	34.55 ± 12.78	33.24 ± 12.78	0.453133
CRP52	7.10 ± 3.01	19.79 ± 5.08	17.05 ± 0.89	0.160392		CRP52	19.46 ± 1.64	47.16 ± 0.87	63.30 ± 0.84	0.00157595		CRP52	21.79 ± 1.01	37.88 ± 12.61	44.46 ± 12.61	0.099454
CRP53	17.16 ± 2.83	25.35 ± 0.91	29.10 ± 0.50	0.0242675		CRP53	23.05 ± 8.67	42.77 ± 0.32	59.29 ± 7.56	0.614243		CRP53	23.91 ± 4.69	28.67 ± 0.06	27.36 ± 0.06	0.365893
CRP54	8.26 ± 6.33	15.20 ± 2.23	22.75 ± 1.19	0.000147995		CRP54	27.40 ± 6.43	44.91 ± 9.02	51.15 ± 1.08	6.84251e-07		CRP54	20.47 ± 1.42	33.20 ± 0.85	31.89 ± 0.85	0.317031
CRP55	10.01 ± 7.34	11.93 ± 1.27	14.86 ± 3.57	0.000640957		CRP55	22.08 ± 5.33	26.43 ± 0.26	28.00 ± 8.00	0.00241019		CRP55	20.81 ± 1.29	23.35 ± 0.59	25.03 ± 0.59	0.000265647
Chlorogenic acid						Caffeic acid						p-Coumaric acid
Genotype	0 hpi	12 hpi	24 hpi	P-value		Genotype	0 hpi	12 hpi	24 hpi	P-value		Genotype	0 hpi	12 hpi	24 hpi	P-value
Sonalika	138.02 ± 52.70	149.44 ± 30.66	164.42 ± 16.08	0.688883		Sonalika	5.75 ± 8.77	6.40 ± 6.45	6.43 ± 0.59	0.98914		Sonalika	6.35 ± 2.52	8.53 ± 1.35	12.19 ± 1.17	0.0192678
CRP2	181.42 ± 32.95	261.51 ± 16.78	356.11 ± 27.24	0.00059685		CRP2	7.14 ± 1.78	10.99 ± 0.81	14.69 ± 0.55	0.000688779		CRP2	8.74 ± 3.68	20.04 ± 1.34	16.21 ± 0.83	0.00269054
CRP3	173.35 ± 29.95	341.82 ± 36.87	257.44 ± 22.68	0.0015277		CRP3	6.29 ± 3.41	10.73 ± 0.83	18.28 ± 1.60	0.00167219		CRP3	7.31 ± 0.26	12.14 ± 0.57	19.56 ± 1.78	2.79724e-05
Chirya.3	138.69 ± 37.78	213.24 ± 20.98	280.10 ± 36.01	0.00527712		Chirya.3	8.47 ± 6.97	11.92 ± 1.26	17.07 ± 1.81	0.115868		Chirya.3	8.24 ± 11.85	12.18 ± 1.29	12.53 ± 2.64	0.723274
CRP5	140.91 ± 21.71	168.50 ± 30.97	176.55 ± 23.22	0.000237188		CRP5	4.45 ± 0.89	6.72 ± 2.26	8.82 ± 3.47	0.00401256		CRP5	7.74 ± 0.77	9.27 ± 1.03	10.54 ± 13.22	0.204732
CRP6	185.09 ± 24.94	253.64 ± 6.59	387.68 ± 43.12	0.448791		CRP6	5.16 ± 0.60	8.41 ± 0.60	13.90 ± 0.11	0.614171		CRP6	8.97 ± 4.57	14.21 ± 0.86	14.55 ± 0.54	0.89849
CRP7	182.78 ± 2.05	260.23 ± 33.42	306.04 ± 19.56	0.011991		CRP7	8.23 ± 6.57	11.48 ± 6.57	21.18 ± 0.37	0.549211		CRP7	11.13 ± 4.32	10.64 ± 0.10	17.41 ± 0.39	0.241373
CRP8	168.35 ± 13.44	264.16 ± 14.14	351.46 ± 40.89	0.000882292		CRP8	5.27 ± 2.83	11.60 ± 0.58	11.79 ± 0.60	0.0460339		CRP8	9.20 ± 8.79	18.84 ± 0.89	12.63 ± 1.32	0.0419672
CRP9	188.58 ± 15.37	197.05 ± 30.27	269.18 ± 25.06	0.0410208		CRP9	7.68 ± 3.41	11.48 ± 1.67	13.27 ± 0.59	1.29681e-06		CRP9	10.35 ± 4.71	16.97 ± 2.52	13.77 ± 1.68	0.00822521
CRP10	187.28 ± 28.83	214.39 ± 25.57	171.98 ± 12.63	0.16021		CRP10	5.77 ± 4.19	12.24 ± 4.34	16.68 ± 5.69	0.0806238		CRP10	5.83 ± 2.69	21.33 ± 5.74	23.25 ± 4.60	0.00613657
CRP11	209.19 ± 6.25	277.30 ± 21.27	270.94 ± 58.56	0.465939		CRP11	6.79 ± 3.18	8.89 ± 9.62	22.13 ± 1.89	0.317603		CRP11	11.55 ± 3.03	3.68 ± 1.14	21.37 ± 1.87	0.546655
CRP12	186.86 ± 52.08	356.62 ± 63.48	358.08 ± 51.81	0.846016		CRP12	8.60 ± 0.81	11.10 ± 0.81	15.29 ± 0.10	0.646004		CRP12	7.10 ± 8.04	19.33 ± 1.47	16.53 ± 0.14	0.347391
CRP13	175.63 ± 16.43	207.31 ± 1.17	224.88 ± 7.70	0.962741		CRP13	5.27 ± 2.67	7.99 ± 0.09	9.54 ± 6.96	0.315987		CRP13	8.02 ± 0.51	10.01 ± 0.33	11.73 ± 0.88	0.470088
CRP14	172.37 ± 26.03	362.06 ± 76.41	350.34 ± 26.15	0.0868852		CRP14	5.79 ± 0.84	13.29 ± 0.84	17.70 ± 0.94	0.682448		CRP14	5.47 ± 1.89	18.95 ± 1.15	14.08 ± 0.63	3.75717e-06
CRP15	179.72 ± 19.20	238.53 ± 21.29	323.00 ± 32.82	0.0178846		CRP15	6.64 ± 2.42	8.09 ± 0.84	19.63 ± 5.98	0.0156194		CRP15	11.56 ± 3.64	14.42 ± 1.26	14.09 ± 1.72	3.57367e-05
CRP16	168.82 ± 23.89	219.43 ± 8.76	228.89 ± 10.80	0.00150743		CRP16	4.91 ± 2.80	9.28 ± 2.45	21.68 ± 5.26	0.403909		CRP16	9.42 ± 7.14	6.66 ± 1.02	15.23 ± 0.60	0.0405637
CRP17	180.44 ± 9.99	343.39 ± 43.63	229.05 ± 40.60	0.0455089		CRP17	10.00 ± 2.45	13.55 ± 1.64	21.27 ± 1.05	0.00020641		CRP17	11.86 ± 6.96	20.90 ± 2.52	14.93 ± 0.97	0.00746332
CRP18	173.59 ± 39.03	190.38 ± 9.31	231.26 ± 56.32	0.00238406		CRP18	7.08 ± 2.70	12.23 ± 0.84	23.28 ± 7.23	0.600531		CRP18	14.11 ± 7.64	19.17 ± 1.00	20.61 ± 2.00	0.401042
CRP19	175.77 ± 16.88	374.50 ± 42.24	360.12 ± 7.16	0.011212		CRP19	7.18 ± 2.09	12.59 ± 0.75	13.77 ± 0.06	0.071349		CRP19	6.40 ± 7.63	16.53 ± 0.48	14.32 ± 0.05	0.00173968
CRP20	189.39 ± 16.08	373.33 ± 323.01	263.15 ± 1.64	0.517246		CRP20	8.25 ± 0.81	9.78 ± 0.39	15.52 ± 0.09	6.16181e-06		CRP20	10.68 ± 4.09	19.07 ± 1.88	13.62 ± 0.13	0.0201096
CRP21	215.78 ± 59.78	334.37 ± 29.44	240.32 ± 13.34	0.180785		CRP21	6.88 ± 1.25	10.13 ± 1.25	14.30 ± 0.29	0.816145		CRP21	12.54 ± 7.71	17.22 ± 0.26	13.72 ± 0.75	0.390526
CRP22	158.64 ± 24.72	190.38 ± 9.31	348.45 ± 9.62	0.192698		CRP22	7.25 ± 3.44	13.19 ± 0.85	13.79 ± 0.03	0.989561		CRP22	7.16 ± 2.65	15.06 ± 0.26	17.15 ± 0.06	0.471427
CRP23	151.17 ± 26.30	216.62 ± 9.21	168.36 ± 71.75	0.215554		CRP23	6.03 ± 1.85	12.77 ± 1.43	15.09 ± 1.57	0.824872		CRP23	7.62 ± 2.43	7.43 ± 0.65	14.61 ± 1.17	0.411667
CIANO T79	151.63 ± 15.33	170.42 ± 7.18	174.35 ± 21.40	0.000171601		CIANO T79	6.29 ± 0.89	7.59 ± 0.99	6.20 ± 0.72	0.0403904		CIANO T79	7.99 ± 1.99	8.73 ± 0.34	8.55 ± 0.27	3.40025e-07
CRP25	179.87 ± 32.55	396.21 ± 6.32	249.69 ± 25.19	0.000213327		CRP25	6.17 ± 1.73	11.24 ± 0.25	22.95 ± 3.59	0.00839628		CRP25	5.03 ± 0.97	13.98 ± 0.52	12.39 ± 1.34	0.00447316
CRP26	187.74 ± 13.62	242.92 ± 49.42	224.53 ± 19.60	0.748592		CRP26	6.36 ± 2.12	11.14 ± 1.50	12.86 ± 1.31	0.509972		CRP26	7.07 ± 4.39	17.30 ± 3.27	8.77 ± 1.09	0.0632942
CRP27	158.39 ± 30.60	250.09 ± 19.61	262.37 ± 6.96	0.0134129		CRP27	9.01 ± 3.17	9.26 ± 5.90	15.98 ± 3.95	0.295131		CRP27	8.89 ± 3.40	14.94 ± 7.74	12.33 ± 2.28	0.0111448
CRP28	197.82 ± 30.30	257.41 ± 9.96	243.94 ± 66.45	0.0157502		CRP28	7.63 ± 3.10	12.35 ± 2.46	9.98 ± 8.64	0.000291198		CRP28	11.38 ± 1.00	4.76 ± 0.88	15.20 ± 2.66	0.00584032
CRP29	196.61 ± 20.12	250.63 ± 2.90	293.40 ± 5.25	0.35123		CRP29	9.26 ± 3.87	12.59 ± 0.49	14.68 ± 0.13	0.423264		CRP29	9.56 ± 1.36	13.59 ± 0.26	13.57 ± 0.22	0.29249
CRP30	172.62 ± 37.30	314.55 ± 14.22	264.02 ± 48.15	0.00815171		CRP30	8.00 ± 1.69	10.54 ± 3.41	22.65 ± 2.09	0.000799804		CRP30	7.99 ± 0.46	13.99 ± 0.57	11.01 ± 1.01	0.000160077
CRP31	159.36 ± 44.86	171.78 ± 7.18	189.11 ± 75.58	0.247012		CRP31	4.42 ± 1.87	7.98 ± 0.68	10.49 ± 0.56	0.920426		CRP31	6.59 ± 3.39	8.82 ± 4.74	8.86 ± 0.53	0.542053
CRP32	130.18 ± 50.93	260.86 ± 34.07	264.54 ± 6.97	0.668431		CRP32	4.88 ± 1.70	8.21 ± 0.32	18.14 ± 0.87	0.957033		CRP32	8.98 ± 4.88	13.90 ± 7.20	18.06 ± 0.65	0.214764
CRP33	196.54 ± 31.35	309.33 ± 6.01	173.50 ± 130.96	0.882597		CRP33	4.34 ± 1.67	15.41 ± 1.54	20.23 ± 3.67	0.0391098		CRP33	11.24 ± 6.04	29.71 ± 2.79	11.06 ± 6.07	0.568609
CRP34	152.00 ± 37.71	247.08 ± 19.48	263.95 ± 24.67	0.0377437		CRP34	6.06 ± 2.09	10.06 ± 2.81	22.28 ± 0.11	0.000334773		CRP34	7.78 ± 1.78	18.47 ± 3.54	14.42 ± 0.15	0.00657105
CRP35	171.73 ± 11.98	380.96 ± 35.19	334.05 ± 48.44	0.0141046		CRP35	6.02 ± 1.28	10.65 ± 1.16	22.01 ± 2.08	0.844201		CRP35	12.17 ± 6.50	15.76 ± 1.59	19.04 ± 1.85	0.266897
CRP36	178.93 ± 49.93	361.43 ± 58.14	297.97 ± 113.75	0.838039		CRP36	6.48 ± 2.77	10.94 ± 1.08	23.46 ± 6.48	0.357614		CRP36	5.97 ± 0.27	15.21 ± 1.23	14.87 ± 1.84	2.65052e-07
Yangmai #6	179.23 ± 23.40	305.02 ± 21.54	316.55 ± 7.24	0.444462		Yangmai #6	3.85 ± 0.88	15.65 ± 1.61	18.02 ± 2.19	0.128913		Yangmai #6	10.27 ± 6.20	17.33 ± 1.15	13.65 ± 0.47	0.126802
CRP38	163.89 ± 40.75	253.64 ± 6.59	274.68 ± 82.40	0.534868		CRP38	6.89 ± 0.65	13.14 ± 0.65	23.34 ± 3.40	0.891525		CRP38	7.48 ± 0.51	12.82 ± 0.05	14.40 ± 4.33	0.0175803
CRP39	178.95 ± 56.84	195.26 ± 231.09	200.18 ± 3.01	0.541824		CRP39	9.99 ± 3.65	12.99 ± 3.65	13.06 ± 0.12	0.0498247		CRP39	10.85 ± 2.87	13.20 ± 0.08	13.79 ± 0.06	0.927869
CRP40	179.98 ± 40.85	271.70 ± 41.89	264.34 ± 20.44	0.036005		CRP40	7.30 ± 1.37	8.80 ± 1.26	19.45 ± 0.32	1.82649e-05		CRP40	13.89 ± 8.58	16.01 ± 2.20	13.91 ± 0.58	0.846908
CRP41	149.47 ± 29.75	231.14 ± 35.34	248.16 ± 47.60	0.692226		CRP41	6.87 ± 2.41	9.87 ± 2.41	16.33 ± 5.49	0.941411		CRP41	13.05 ± 4.66	11.93 ± 0.14	10.68 ± 3.45	0.0734978
CRP42	170.85 ± 42.46	227.43 ± 24.60	364.70 ± 69.50	0.266074		CRP42	6.19 ± 1.78	9.99 ± 0.71	14.33 ± 0.18	0.88937		CRP42	8.88 ± 0.51	7.41 ± 0.04	12.45 ± 0.59	0.0396036
CRP43	168.49 ± 21.75	348.32 ± 13.77	290.92 ± 44.44	0.121292		CRP43	6.10 ± 4.09	9.35 ± 4.09	15.02 ± 5.42	0.198789		CRP43	5.88 ± 2.46	14.39 ± 0.65	10.67 ± 1.01	0.40437
CRP44	144.87 ± 35.97	318.93 ± 19.89	326.06 ± 65.71	0.00199792		CRP44	5.03 ± 0.33	8.90 ± 0.76	16.66 ± 3.07	0.957005		CRP44	4.16 ± 0.55	12.46 ± 1.31	16.71 ± 1.85	1.61059e-06
CRP45	150.07 ± 37.81	207.54 ± 13.69	238.66 ± 4.62	0.000208275		CRP45	5.51 ± 1.36	8.02 ± 1.07	20.79 ± 0.19	0.018145		CRP45	5.40 ± 2.09	7.83 ± 0.53	11.61 ± 0.26	0.000142054
CRP46	191.52 ± 28.47	389.36 ± 31.71	345.43 ± 12.15	0.451553		CRP46	4.20 ± 5.58	11.10 ± 0.99	17.58 ± 4.61	0.89552		CRP46	15.24 ± 7.25	18.26 ± 1.58	14.22 ± 0.20	2.20387e-05
CRP47	209.84 ± 32.75	342.93 ± 60.81	229.79 ± 9.94	0.100704		CRP47	2.09 ± 1.33	8.00 ± 2.65	24.13 ± 2.92	0.859061		CRP47	8.87 ± 0.75	14.14 ± 0.75	19.28 ± 3.00	0.527946
CRP48	179.73 ± 16.58	206.35 ± 36.55	215.86 ± 28.41	0.0315933		CRP48	6.34 ± 3.31	8.98 ± 2.31	8.01 ± 0.12	0.322827		CRP48	12.04 ± 7.09	14.06 ± 0.90	15.75 ± 0.50	0.00355019
CRP49	164.11 ± 15.54	384.19 ± 12.21	204.29 ± 15.16	0.000109067		CRP49	5.19 ± 2.77	8.69 ± 2.77	18.18 ± 0.38	0.00102217		CRP49	6.77 ± 3.00	22.78 ± 0.52	11.53 ± 0.86	0.00595646
CRP50	155.27 ± 29.47	310.47 ± 24.88	282.88 ± 4.58	0.000319107		CRP50	7.22 ± 2.26	7.95 ± 0.89	15.00 ± 0.13	0.000905907		CRP50	11.88 ± 5.00	12.18 ± 0.56	12.15 ± 5.91	0.99591
CRP51	186.47 ± 33.00	204.27 ± 18.80	288.70 ± 19.39	0.378007		CRP51	4.08 ± 5.14	7.58 ± 5.14	18.63 ± 3.84	0.231894		CRP51	10.47 ± 2.95	13.28 ± 0.64	14.08 ± 0.39	0.3352
CRP52	175.30 ± 15.43	204.28 ± 12.82	267.35 ± 5.43	0.628865		CRP52	7.57 ± 1.15	13.08 ± 1.15	14.58 ± 0.13	0.694351		CRP52	7.98 ± 0.33	15.92 ± 0.75	15.55 ± 0.31	0.326495
CRP53	206.76 ± 25.79	250.35 ± 19.64	322.45 ± 15.17	0.00926771		CRP53	9.28 ± 2.42	14.46 ± 0.54	23.46 ± 0.57	0.000435031		CRP53	10.41 ± 2.22	19.90 ± 0.81	14.44 ± 0.08	0.0459932
CRP54	185.76 ± 27.47	297.35 ± 34.31	295.65 ± 35.54	0.00399918		CRP54	6.46 ± 0.66	7.96 ± 1.13	17.58 ± 1.01	0.00333599		CRP54	9.10 ± 1.57	17.76 ± 2.33	13.66 ± 1.73	0.013753
CRP55	187.25 ± 28.10	203.56 ± 37.16	219.10 ± 7.58	0.355926		CRP55	5.13 ± 2.82	7.97 ± 0.71	8.23 ± 0.29	3.00758e-05		CRP55	9.27 ± 5.85	12.78 ± 1.25	12.71 ± 0.21	0.189911
Ferulic acid
Genotype	0 hpi	12 hpi	24 hpi	P-value
Sonalika	4.12 ± 4.72	7.09 ± 1.10	7.56 ± 0.39	0.334224
CRP2	4.72 ± 3.02	11.95 ± 0.40	8.49 ± 2.09	0.0172144
CRP3	5.96 ± 0.11	11.04 ± 0.31	11.94 ± 0.44	8.80146e-07
Chirya.3	3.56 ± 3.28	12.03 ± 0.69	9.88 ± 0.04	0.00424948
CRP5	5.58 ± 1.71	7.75 ± 0.31	8.29 ± 1.34	0.00184409
CRP6	4.34 ± 1.31	9.11 ± 0.20	9.87 ± 0.38	0.439408
CRP7	6.27 ± 2.78	9.13 ± 0.05	12.83 ± 0.13	0.000122831
CRP8	4.68 ± 0.80	10.44 ± 0.20	7.25 ± 0.35	0.471609
CRP9	4.08 ± 1.13	9.68 ± 1.20	8.35 ± 0.88	3.85799e-05
CRP10	6.19 ± 3.15	12.20 ± 2.68	11.23 ± 1.23	0.0519193
CRP11	1.92 ± 0.44	11.26 ± 1.74	13.12 ± 0.59	0.01309
CRP12	2.51 ± 1.52	6.34 ± 0.02	9.86 ± 0.16	0.14345
CRP13	6.23 ± 0.51	6.27 ± 0.01	8.49 ± 0.18	0.924997
CRP14	7.28 ± 1.28	8.10 ± 3.42	9.51 ± 0.23	0.00132606
CRP15	4.31 ± 3.10	9.88 ± 0.33	10.82 ± 0.48	0.49472
CRP16	3.49 ± 1.38	8.02 ± 0.85	10.92 ± 0.60	0.00555048
CRP17	3.91 ± 4.24	6.23 ± 0.02	10.16 ± 0.24	1.25312e-05
CRP18	5.39 ± 2.31	12.66 ± 0.37	14.63 ± 1.61	0.0167889
CRP19	4.55 ± 6.26	8.27 ± 2.62	10.46 ± 0.09	0.00193513
CRP20	5.17 ± 2.09	9.51 ± 1.12	9.27 ± 0.10	0.0136615
CRP21	3.38 ± 3.50	11.06 ± 0.98	9.98 ± 0.32	0.852489
CRP22	2.55 ± 2.02	13.09 ± 0.30	8.57 ± 0.06	0.989413
CRP23	2.25 ± 1.61	6.24 ± 0.02	8.34 ± 1.30	0.0353663
CIANO T79	4.32 ± 0.15	5.27 ± 0.12	5.66 ± 0.78	2.06437e-05
CRP25	4.21 ± 2.19	13.91 ± 0.14	7.78 ± 0.13	0.00657351
CRP26	4.14 ± 0.69	11.87 ± 3.75	9.51 ± 1.56	0.0891925
CRP27	7.46 ± 0.52	6.98 ± 1.02	10.14 ± 1.21	0.170938
CRP28	5.51 ± 1.80	8.12 ± 0.41	8.17 ± 1.82	0.00992071
CRP29	3.84 ± 0.26	6.51 ± 0.66	7.94 ± 0.11	0.143078
CRP30	5.00 ± 0.84	7.53 ± 0.55	8.45 ± 0.19	0.000943824
CRP31	4.06 ± 2.42	6.79 ± 1.00	8.03 ± 0.12	0.941367
CRP32	3.79 ± 0.81	9.42 ± 1.49	11.92 ± 1.01	0.50473
CRP33	4.37 ± 1.83	9.20 ± 1.70	10.24 ± 0.32	0.671604
CRP34	3.69 ± 0.50	8.27 ± 3.60	9.39 ± 0.08	0.116149
CRP35	3.94 ± 3.11	12.09 ± 0.66	9.23 ± 0.31	0.386369
CRP36	5.50 ± 1.20	11.87 ± 4.87	7.38 ± 0.95	1.90579e-09
Yangmai #6	3.81 ± 0.78	6.55 ± 0.03	13.19 ± 3.74	0.00076783
CRP38	5.12 ± 1.56	10.88 ± 0.07	11.33 ± 1.23	0.00965468
CRP39	4.65 ± 2.50	6.88 ± 0.18	7.18 ± 0.09	0.330684
CRP40	4.18 ± 1.89	11.84 ± 1.43	10.04 ± 0.14	0.00116936
CRP41	3.67 ± 2.40	10.76 ± 1.10	8.17 ± 1.90	0.223009
CRP42	4.64 ± 2.30	9.87 ± 0.08	9.63 ± 0.40	0.0291535
CRP43	7.37 ± 2.44	6.68 ± 0.79	7.30 ± 0.16	0.548639
CRP44	7.64 ± 1.48	8.62 ± 0.81	8.27 ± 0.19	0.00162964
CRP45	4.09 ± 1.71	10.47 ± 0.87	8.92 ± 0.04	0.304522
CRP46	3.07 ± 1.60	11.50 ± 3.42	9.10 ± 0.20	0.167391
CRP47	5.90 ± 3.53	9.45 ± 0.43	10.76 ± 1.24	0.109437
CRP48	5.45 ± 1.48	8.29 ± 0.69	8.26 ± 0.16	0.00177749
CRP49	5.92 ± 3.55	9.56 ± 5.24	7.43 ± 0.09	0.00329081
CRP50	4.76 ± 0.39	8.73 ± 0.58	8.92 ± 0.14	2.70816e-05
CRP51	5.20 ± 1.51	8.75 ± 0.64	6.08 ± 0.21	0.854752
CRP52	4.25 ± 0.47	7.94 ± 2.26	8.93 ± 0.14	0.251954
CRP53	4.29 ± 3.71	13.43 ± 0.34	10.85 ± 0.19	0.00810949
CRP54	6.87 ± 2.91	11.39 ± 0.77	10.26 ± 0.98	1.11472e-07
CRP55	5.31 ± 2.52	6.95 ± 0.60	8.47 ± 0.28	0.506661

## Sheet: Total bound phenolics
C. Accumulation of total bound phenolic content (µg g-1 FW) in 55 CRP genotypes during spot blotch infection. Values are expressed as mean ± SD. ANOVA is used to compare each genotype across the time point with significant difference at P≤0.05. Red colors belong to susceptible genotypes
Genotype	0 hpi	12 hpi	24 hpi	P-value
Sonalika	1.05 ± 0.27	0.75 ± 0.03	0.85 ± 0.168	0.214077
CRP2	1.56 ± 0.09	1.76 ± 0.74	1.80 ± 0.199	0.314142
CRP3	1.13 ± 0.32	1.19 ± 0.37	1.32 ± 0.219	0.757256
Chirya.3	1.15 ± 0.15	1.17 ± 0.09	0.93 ± 0.058	0.0865777
CRP5	1.67 ± 0.10	1.97 ± 0.04	1.81 ± 0.121	3.75571e-05
CRP6	1.00 ± 0.21	1.25 ± 0.06	1.31 ± 0.329	0.0321125
CRP7	1.28 ± 0.06	1.38 ± 0.07	1.46 ± 0.100	8.82463e-05
CRP8	0.92 ± 0.07	1.36 ± 0.41	0.91 ± 0.120	0.305522
CRP9	1.90 ± 0.09	1.96 ± 0.15	1.85 ± 0.176	0.0061393
CRP10	0.97 ± 0.12	1.22 ± 0.47	1.02 ± 0.622	0.788702
CRP11	1.35 ± 0.55	1.44 ± 0.19	1.27 ± 0.484	0.740608
CRP12	1.16 ± 0.13	1.78 ± 0.25	1.31 ± 0.190	0.402892
CRP13	1.17 ± 0.13	1.25 ± 0.04	0.98 ± 0.454	0.00246154
CRP14	1.54 ± 0.51	1.74 ± 0.22	1.70 ± 0.307	0.143237
CRP15	1.23 ± 0.23	1.43 ± 0.04	1.60 ± 0.150	0.490078
CRP16	1.15 ± 0.20	1.47 ± 0.06	1.07 ± 0.032	0.000932825
CRP17	1.23 ± 0.23	1.35 ± 0.16	2.98 ± 0.036	0.584642
CRP18	1.07 ± 0.15	1.68 ± 0.19	1.57 ± 0.175	0.016865
CRP19	1.90 ± 0.11	2.01 ± 0.02	1.57 ± 0.179	3.00812e-05
CRP20	1.02 ± 0.26	2.20 ± 0.15	1.55 ± 0.397	0.00708097
CRP21	0.97 ± 0.08	1.44 ± 0.17	1.21 ± 0.172	0.000141428
CRP22	1.13 ± 0.20	1.28 ± 0.18	1.21 ± 0.595	1.28246e-05
CRP23	1.59 ± 0.02	2.10 ± 0.44	1.83 ± 0.113	0.00431354
CIANO T79	1.57 ± 0.11	1.65 ± 0.12	1.55 ± 0.109	0.612126
CRP25	0.87 ± 0.07	1.63 ± 0.06	1.10 ± 0.170	0.295957
CRP26	1.76 ± 0.07	1.84 ± 0.30	1.64 ± 0.626	0.0454465
CRP27	1.38 ± 0.27	2.44 ± 1.10	1.43 ± 0.157	0.803125
CRP28	1.24 ± 0.17	1.91 ± 0.02	1.32 ± 0.214	0.185972
CRP29	1.03 ± 0.27	1.93 ± 0.02	0.68 ± 0.092	0.00260118
CRP30	1.21 ± 0.08	1.62 ± 0.04	1.23 ± 0.292	0.0515317
CRP31	0.97 ± 0.26	1.03 ± 0.17	1.17 ± 0.077	0.0163476
CRP32	1.79 ± 0.18	1.94 ± 0.02	1.99 ± 0.135	0.295515
CRP33	1.24 ± 0.28	1.23 ± 0.09	1.14 ± 0.389	0.08961
CRP34	1.32 ± 0.04	1.90 ± 0.16	1.38 ± 0.330	0.0121785
CRP35	1.06 ± 0.28	1.54 ± 0.42	1.99 ± 0.738	0.072255
CRP36	1.14 ± 0.17	1.49 ± 0.17	1.12 ± 0.168	0.00451181
Yangmai #6	1.63 ± 0.41	2.22 ± 0.43	2.10 ± 0.249	0.627886
CRP38	1.08 ± 0.14	1.07 ± 0.08	1.15 ± 0.634	0.149653
CRP39	1.20 ± 0.14	1.24 ± 0.06	1.32 ± 0.103	0.054347
CRP40	1.11 ± 0.20	1.74 ± 0.19	1.50 ± 0.067	0.00901991
CRP41	1.13 ± 0.03	2.47 ± 0.02	1.97 ± 0.099	0.854591
CRP42	1.29 ± 0.58	1.57 ± 0.04	0.75 ± 0.029	0.101792
CRP43	1.25 ± 0.21	1.40 ± 0.08	1.41 ± 0.137	0.0351498
CRP44	1.23 ± 0.10	2.33 ± 0.15	1.79 ± 0.122	1.59761e-07
CRP45	1.20 ± 0.10	2.41 ± 0.20	1.14 ± 0.074	0.000572525
CRP46	1.03 ± 0.10	1.38 ± 0.16	1.06 ± 0.497	6.55407e-05
CRP47	1.07 ± 0.09	2.41 ± 0.28	1.92 ± 0.040	0.000518455
CRP48	1.34 ± 0.04	1.48 ± 0.15	1.19 ± 0.217	0.0457563
CRP49	1.71 ± 0.38	2.31 ± 0.06	1.85 ± 0.146	0.077841
CRP50	1.43 ± 0.16	2.07 ± 0.11	1.46 ± 0.110	0.00139486
CRP51	0.83 ± 0.23	2.02 ± 0.19	1.77 ± 0.413	0.402936
CRP52	0.93 ± 0.04	0.99 ± 0.18	1.18 ± 0.336	0.000923717
CRP53	1.02 ± 0.16	2.03 ± 0.32	1.09 ± 0.110	0.0504838
CRP54	1.04 ± 0.24	1.99 ± 0.69	1.32 ± 0.125	0.00358557
CRP55	1.09 ± 0.10	1.29 ± 0.22	1.35 ± 0.096	0.0544207

## Sheet: Bound individual phenolics
D. Distribution of bound individual phenolic acids (p-Coumaric Acid and Ferulic acid) (µg g-1 FW) in spot blotch infected CRP genotypes. Values are expressed as mean ± SD; Significance differences are done by ANOVA where across time points within a genotype are selected at P≤0.05. Red colors belong to susceptible genotypes
p-Coumaric Acid						Ferulic Acid
Genotype	0 hpi	12 hpi	24 hpi	P-value		Genotype	0 hpi	12 hpi	24 hpi	P-value
Sonalika	63.43 ± 2.14	75.33 ± 3.03	77.91 ± 0.50	0.000381983		Sonalika	73.29 ± 9.23	78.20 ± 2.01	76.62 ± 1.17	0.567232
CRP2	57.59 ± 9.54	117.63 ± 22.82	73.81 ± 1.46	0.0053545		CRP2	87.91 ± 12.06	125.74 ± 4.40	110.05 ± 19.67	0.038375
CRP3	60.07 ± 9.59	105.60 ± 13.43	60.90 ± 8.25	0.00294254		CRP3	69.97 ± 12.40	163.98 ± 75.30	90.61 ± 16.53	0.0937614
Chirya.3	62.21 ± 8.16	78.30 ± 6.76	79.48 ± 1.13	0.0241483		Chirya.3	93.26 ± 16.71	98.07 ± 22.93	83.32 ± 48.08	0.852982
CRP5	54.92 ± 5.44	65.94 ± 27.33	70.80 ± 1.80	0.113753		CRP5	68.77 ± 2.55	74.39 ± 7.71	79.60 ± 24.00	0.456032
CRP6	71.91 ± 10.91	131.06 ± 5.96	91.55 ± 4.69	0.132158		CRP6	79.22 ± 14.40	92.97 ± 14.40	131.94 ± 10.19	0.0405686
CRP7	73.00 ± 13.04	100.54 ± 4.42	74.27 ± 1.73	8.26044e-05		CRP7	108.17 ± 18.10	121.91 ± 18.10	108.45 ± 2.31	0.0510828
CRP8	54.14 ± 7.74	106.66 ± 0.31	71.72 ± 0.82	0.0502516		CRP8	70.04 ± 9.33	83.78 ± 9.33	122.62 ± 1.16	0.00185199
CRP9	61.81 ± 10.46	94.67 ± 9.46	74.94 ± 7.11	0.640247		CRP9	88.03 ± 7.61	101.77 ± 7.61	107.95 ± 11.01	0.0550864
CRP10	62.31 ± 7.82	101.97 ± 5.15	82.02 ± 6.89	0.00108665		CRP10	102.01 ± 10.15	115.75 ± 10.15	87.91 ± 46.41	0.516406
CRP11	52.79 ± 3.43	93.47 ± 2.18	73.06 ± 4.22	0.106848		CRP11	79.41 ± 5.64	102.26 ± 5.64	132.49 ± 10.05	0.142061
CRP12	68.74 ± 9.76	105.11 ± 14.32	84.43 ± 4.18	0.740314		CRP12	84.67 ± 3.61	107.52 ± 3.61	130.41 ± 7.47	0.510505
CRP13	59.69 ± 7.13	69.70 ± 16.45	72.47 ± 9.52	0.0697938		CRP13	75.87 ± 4.40	88.72 ± 4.40	87.57 ± 12.45	0.0234558
CRP14	70.65 ± 9.20	107.40 ± 4.29	67.75 ± 27.53	0.337198		CRP14	94.59 ± 7.34	117.44 ± 7.34	116.20 ± 24.61	0.142061
CRP15	71.12 ± 10.95	94.98 ± 0.03	70.37 ± 3.88	0.00037497		CRP15	102.25 ± 16.05	125.11 ± 16.05	126.47 ± 8.96	0.0913281
CRP16	65.02 ± 11.11	70.13 ± 8.10	78.18 ± 2.75	0.00415889		CRP16	106.17 ± 10.15	142.77 ± 10.15	121.72 ± 5.06	0.000129059
CRP17	59.70 ± 6.86	108.37 ± 7.34	68.29 ± 3.99	0.168734		CRP17	77.45 ± 9.23	105.22 ± 2.01	112.02 ± 7.38	0.231902
CRP18	48.05 ± 4.31	87.64 ± 5.08	87.85 ± 11.55	0.724711		CRP18	69.03 ± 4.54	106.81 ± 5.13	135.81 ± 18.60	0.728603
CRP19	56.17 ± 2.58	110.16 ± 3.22	75.42 ± 1.46	0.0393455		CRP19	88.83 ± 3.61	134.54 ± 3.61	87.35 ± 4.64	0.00722259
CRP20	64.41 ± 5.14	71.43 ± 10.84	77.82 ± 0.91	0.138472		CRP20	80.03 ± 4.40	130.43 ± 17.51	121.49 ± 1.55	0.00227373
CRP21	54.12 ± 8.80	83.07 ± 50.15	69.87 ± 2.34	0.874483		CRP21	88.22 ± 3.47	119.18 ± 10.04	114.92 ± 3.56	0.0807509
CRP22	55.94 ± 6.16	90.40 ± 5.08	77.68 ± 1.38	0.438515		CRP22	95.26 ± 3.91	140.97 ± 3.91	123.10 ± 3.09	0.48007
CRP23	57.83 ± 10.53	76.10 ± 57.92	67.61 ± 1.66	0.538587		CRP23	79.28 ± 10.92	119.39 ± 16.01	107.40 ± 1.81	0.526295
CIANO T79	57.46 ± 8.23	62.39 ± 4.44	62.87 ± 2.53	0.925834		CIANO T79	83.13 ± 8.54	97.31 ± 2.71	70.40 ± 1.98	0.0863581
CRP25	50.99 ± 13.85	109.42 ± 9.81	87.70 ± 9.36	0.00627501		CRP25	83.78 ± 19.08	132.03 ± 24.31	129.75 ± 16.42	0.0211987
CRP26	63.76 ± 11.28	110.80 ± 19.98	96.09 ± 8.41	0.567514		CRP26	96.12 ± 11.96	141.61 ± 5.01	106.98 ± 13.78	0.523647
CRP27	54.73 ± 20.96	75.54 ± 10.21	70.51 ± 12.61	0.00196906		CRP27	89.21 ± 13.68	124.86 ± 33.23	104.72 ± 14.31	0.00269991
CRP28	66.73 ± 7.81	97.19 ± 0.69	63.88 ± 3.25	0.00375326		CRP28	73.21 ± 32.90	97.92 ± 42.28	96.17 ± 7.39	0.00317816
CRP29	56.97 ± 5.77	82.26 ± 40.85	58.51 ± 2.12	0.234216		CRP29	63.64 ± 28.79	95.07 ± 21.80	138.33 ± 4.91	0.00408546
CRP30	65.08 ± 11.28	100.03 ± 4.56	91.94 ± 4.18	0.00283509		CRP30	93.52 ± 7.28	83.71 ± 12.40	130.05 ± 7.87	0.00222537
CRP31	51.08 ± 22.27	58.97 ± 4.56	67.33 ± 7.12	0.545551		CRP31	67.33 ± 23.89	71.20 ± 6.62	73.70 ± 9.49	0.340432
CRP32	64.84 ± 15.63	92.14 ± 2.10	90.84 ± 2.02	0.215209		CRP32	98.23 ± 26.22	108.73 ± 32.47	128.81 ± 13.44	0.343302
CRP33	63.54 ± 5.75	94.32 ± 8.92	86.17 ± 3.34	0.0244602		CRP33	68.40 ± 29.63	88.07 ± 19.79	124.71 ± 3.24	0.194643
CRP34	53.17 ± 6.87	82.96 ± 0.68	90.63 ± 4.29	0.025482		CRP34	78.70 ± 11.05	90.33 ± 9.08	28.17 ± 4.22	0.512279
CRP35	60.85 ± 8.57	95.00 ± 0.03	75.87 ± 6.58	0.0587479		CRP35	68.22 ± 24.48	92.09 ± 12.64	112.34 ± 12.56	0.343271
CRP36	67.17 ± 9.99	103.83 ± 14.46	82.43 ± 5.06	0.226886		CRP36	91.08 ± 13.99	104.82 ± 13.99	102.48 ± 10.01	0.349582
Yangmai #6	54.95 ± 3.39	97.36 ± 3.03	73.00 ± 5.89	0.0322815		Yangmai #6	99.28 ± 21.76	113.03 ± 21.76	96.71 ± 3.59	0.00834326
CRP38	64.90 ± 3.89	106.56 ± 0.73	70.78 ± 27.66	0.0418422		CRP38	96.20 ± 9.69	109.94 ± 9.69	113.58 ± 20.74	5.95137e-05
CRP39	57.10 ± 2.64	63.72 ± 24.70	68.00 ± 5.24	0.934729		CRP39	71.58 ± 19.64	75.45 ± 7.89	81.37 ± 8.63	0.177724
CRP40	65.28 ± 8.09	123.19 ± 12.89	74.22 ± 4.27	0.00049116		CRP40	84.33 ± 22.93	107.00 ± 16.71	106.69 ± 9.41	0.25983
CRP41	65.76 ± 9.36	128.15 ± 10.93	70.50 ± 2.53	0.509089		CRP41	104.80 ± 21.40	118.54 ± 21.40	102.46 ± 3.93	0.174363
CRP42	53.80 ± 14.91	143.10 ± 9.89	76.06 ± 2.98	0.988151		CRP42	75.44 ± 18.29	89.19 ± 18.29	112.56 ± 7.70	0.0350456
CRP43	63.11 ± 12.60	118.01 ± 12.50	77.53 ± 13.27	0.730176		CRP43	76.55 ± 16.09	100.41 ± 1.71	121.23 ± 26.62	0.199825
CRP44	51.39 ± 13.03	109.68 ± 9.54	85.05 ± 1.54	0.0843773		CRP44	100.53 ± 13.49	112.96 ± 15.75	119.26 ± 3.28	0.163874
CRP45	50.09 ± 13.31	80.82 ± 6.26	98.11 ± 4.69	0.0100029		CRP45	73.12 ± 19.14	74.43 ± 16.14	126.72 ± 5.53	0.0195494
CRP46	50.30 ± 4.56	95.13 ± 6.43	68.43 ± 20.44	0.315704		CRP46	62.44 ± 3.88	76.18 ± 3.88	93.50 ± 37.09	0.115059
CRP47	65.72 ± 7.75	96.32 ± 12.36	86.16 ± 12.97	0.556932		CRP47	80.46 ± 26.11	94.20 ± 26.11	120.09 ± 9.69	0.417722
CRP48	62.10 ± 10.14	73.49 ± 4.29	64.34 ± 2.87	0.063928		CRP48	90.49 ± 24.52	104.35 ± 11.84	89.06 ± 5.72	0.225422
CRP49	60.35 ± 6.35	86.12 ± 17.81	94.83 ± 4.21	0.00897734		CRP49	114.54 ± 3.43	128.28 ± 3.43	125.70 ± 6.59	0.00204749
CRP50	40.62 ± 7.48	81.49 ± 1.94	83.66 ± 6.54	0.000165898		CRP50	70.65 ± 7.71	82.51 ± 2.55	96.95 ± 20.39	0.111145
CRP51	44.53 ± 23.86	95.00 ± 11.37	74.51 ± 6.09	0.228369		CRP51	91.88 ± 10.88	105.62 ± 10.88	106.63 ± 7.51	0.0183853
CRP52	75.58 ± 19.79	77.48 ± 2.26	72.88 ± 6.54	0.00480929		CRP52	115.07 ± 13.74	128.81 ± 13.74	94.80 ± 2.78	0.0306421
CRP53	56.70 ± 13.92	86.73 ± 1.99	71.15 ± 3.35	0.034859		CRP53	72.63 ± 13.37	86.37 ± 13.37	99.79 ± 4.98	0.036367
CRP54	69.64 ± 17.37	99.37 ± 12.91	93.58 ± 5.22	0.0110581		CRP54	96.64 ± 17.49	110.38 ± 17.49	138.21 ± 6.28	0.0174956
CRP55	41.20 ± 3.22	57.93 ± 9.43	61.32 ± 3.82	0.00186072		CRP55	68.26 ± 9.78	82.00 ± 9.78	82.64 ± 10.21	0.00196487
